# Supplementary material
Source: MDPI journal article supplement (https://www.mdpi.com/1424-2818/13/11/598)
Supplement: s1 [file s1]

**Table S1.** Average mass of individuals captured, proportion of wet mass to dry mass, and proportion of carbon, nitrogen, and phosphorus for each species. Stoichiometric proportions were taken from Knapp et al. (2021). *Anaxyrus terrestris* was detected in this study but not Knapp et al. (2021); therefore, we used stoichiometric measurements from Luhning et al. 2018.

| Species                           | Average Mass Captured (g) | WM-DM Proportion | Proportion of Carbon | Proportion of Nitrogen | Proportion of Phosphorus |
|-----------------------------------|---------------------------|------------------|----------------------|------------------------|--------------------------|
| <i>Acris gryllus</i>              | 0.171                     | 0.224            | 0.461                | 0.102                  | 0.012                    |
| <i>Ambystoma talpoideum</i>       | 6.608                     | 0.220            | 0.474                | 0.118                  | 0.018                    |
| <i>Ambystoma tigrinum</i>         | 15.638                    | 0.141            | 0.459                | 0.120                  | 0.017                    |
| <i>Anaxyrus terrestris</i>        | 0.221                     | 0.207            | 0.373                | 0.097                  | 0.016                    |
| <i>Gastrophryne carolinensis</i>  | 0.165                     | 0.172            | 0.408                | 0.102                  | 0.018                    |
| <i>Hyla cinerea</i>               | 1.210                     | 0.215            | 0.466                | 0.108                  | 0.012                    |
| <i>Hyla gratiosa</i>              | 1.729                     | 0.206            | 0.482                | 0.096                  | 0.011                    |
| <i>Hyla squirella</i>             | 0.700                     | 0.173            | 0.446                | 0.110                  | 0.015                    |
| <i>Lithobates catesbeianus</i>    | 14.064                    | 0.226            | 0.503                | 0.096                  | 0.012                    |
| <i>Lithobates sphenoccephalus</i> | 2.617                     | 0.202            | 0.466                | 0.100                  | 0.017                    |
| <i>Pseudacris nigrata</i>         | 0.249                     | 0.245            | 0.465                | 0.105                  | 0.011                    |
| <i>Pseudacris ornata</i>          | 0.636                     | 0.244            | 0.477                | 0.107                  | 0.009                    |
| <i>Scaphiopus holbrookii</i>      | 0.398                     | 0.223            | 0.441                | 0.094                  | 0.017                    |

**Table S2.** Monthly environmental data from W51 and the on-site weather station used in the NMDS and manyGLM analyses. The Avg\_Daily\_Sq\_Area is the average m2 of the wetland that was inundated over that month based on two measurements of staff gauge height extrapolated to a digital elevation model. Hydro\_prop is the proportion of time during the month in which the wetland contained water. The Total\_Monthly\_Rain and the Avg\_Daily\_Temp represent the total rain received over that month (mm) and the average daily temperature (°C) during the sampling time period.

| Year | Combined     | Month | Avg_Daily_Sq_Area | Hydro_Prop | Total_Monthly_Rain | Avg_Daily_Temp |
|------|--------------|-------|-------------------|------------|--------------------|----------------|
| 2003 | January.2003 | Jan   | 2903.14175        | 1          | 5.08               | 6.936161       |
| 2004 | January.2004 | Jan   | 2983.4316         | 1          | 92.708             | 8.714419       |
| 2005 | January.2005 | Jan   | 2697.6912         | 1          | 56.9               | 10.960129      |

|      |               |     |            |            |         |           |
|------|---------------|-----|------------|------------|---------|-----------|
| 2006 | January.2006  | Jan | 4941.65655 | 1          | 181.582 | 12.62329  |
| 2007 | January.2007  | Jan | 1982.4221  | 1          | 126.746 | 10.761452 |
| 2008 | January.2008  | Jan | 1518.3948  | 1          | 85.858  | 8.532581  |
| 2009 | January.2009  | Jan | 4474.78945 | 1          | 45.974  | 10.13729  |
| 2010 | January.2010  | Jan | 7121.8804  | 1          | 197.316 | 6.650032  |
| 2011 | January.2011  | Jan | 616.64665  | 1          | 112.78  | 6.60471   |
| 2003 | February.2003 | Feb | 2129.1294  | 1          | 128.016 | 11.273143 |
| 2004 | February.2004 | Feb | 4011.6243  | 1          | 160.784 | 9.413207  |
| 2005 | February.2005 | Feb | 2498.12595 | 1          | 67.3    | 12.084    |
| 2006 | February.2006 | Feb | 5425.4515  | 1          | 106.172 | 10.122929 |
| 2007 | February.2007 | Feb | 4114.29925 | 1          | 88.64   | 9.645407  |
| 2008 | February.2008 | Feb | 4189.57565 | 1          | 181.616 | 11.624276 |
| 2009 | February.2009 | Feb | 4295.85615 | 0.96551724 | 100.342 | 10.414036 |
| 2010 | February.2010 | Feb | 9621.9926  | 1          | 89.656  | 7.104964  |
| 2011 | February.2011 | Feb | 3112.97395 | 1          | 126.748 | 11.732    |
| 2003 | March.2003    | Mar | 3922.6613  | 1          | 200.668 | 16.658065 |
| 2004 | March.2004    | Mar | 4096.04867 | 1          | 23.63   | 16.144194 |
| 2005 | March.2005    | Mar | 3564.24977 | 1          | 252.968 | 13.656839 |
| 2006 | March.2006    | Mar | 4820.26703 | 1          | 3.048   | 15.040968 |
| 2007 | March.2007    | Mar | 4762.9999  | 1          | 38.608  | 16.212613 |
| 2008 | March.2008    | Mar | 6108.0012  | 1          | 73.91   | 14.271    |
| 2009 | March.2009    | Mar | 4939.743   | 1          | 298.454 | 15.076645 |
| 2010 | March.2010    | Mar | 9621.9926  | 1          | 80.522  | 12.527767 |
| 2011 | March.2011    | Mar | 4380.24395 | 1          | 121.162 | 16.206452 |
| 2003 | April.2003    | Apr | 4334.47305 | 1          | 151.646 | 18.809333 |
| 2004 | April.2004    | Apr | 2498.05    | 1          | 96.266  | 17.563    |
| 2005 | April.2005    | Apr | 7917.1737  | 1          | 223.51  | 16.986333 |
| 2006 | April.2006    | Apr | 2159.83275 | 1          | 49.278  | 20.765333 |
| 2007 | April.2007    | Apr | 3556.65495 | 1          | 65.274  | 17.340333 |
| 2008 | April.2008    | Apr | 5553.1032  | 1          | 55.882  | 18.620667 |
| 2009 | April.2009    | Apr | 9621.9926  | 1          | 182.342 | 18.501667 |

|      |             |     |            |            |         |           |
|------|-------------|-----|------------|------------|---------|-----------|
| 2010 | April.2010  | Apr | 8193.0976  | 1          | 99.808  | 19.166333 |
| 2011 | April.2011  | Apr | 4401.2867  | 1          | 50.546  | 20.217    |
| 2003 | May.2003    | May | 3800.55033 | 1          | 65.02   | 23.525484 |
| 2004 | May.2004    | May | 1688.4771  | 1          | 16.762  | 23.415484 |
| 2005 | May.2005    | May | 7498.7153  | 1          | 78.49   | 21.59129  |
| 2006 | May.2006    | May | 900.54015  | 1          | 166.116 | 22.676774 |
| 2007 | May.2007    | May | 1001.55295 | 1          | 0.254   | 22.947742 |
| 2008 | May.2008    | May | 2711.1934  | 1          | 19.556  | 23.538065 |
| 2009 | May.2009    | May | 9621.9926  | 1          | 86.364  | 22.977742 |
| 2010 | May.2010    | May | 8516.81755 | 1          | 84.836  | 24.15871  |
| 2011 | May.2011    | May | 1988.8339  | 0.64516129 | 17.268  | 22.989355 |
| 2003 | June.2003   | Jun | 3924.5955  | 1          | 149.868 | 25.352759 |
| 2004 | June.2004   | Jun | 900.54015  | 1          | 154.178 | 25.033    |
| 2005 | June.2005   | Jun | 7271.95125 | 1          | 180.84  | 25.233667 |
| 2006 | June.2006   | Jun | 37.2242    | 1          | 112.794 | 25.781333 |
| 2007 | June.2007   | Jun | 0          | 0          | 50.802  | 26.216667 |
| 2008 | June.2008   | Jun | 196.40775  | 0.25       | 64.512  | 26.645667 |
| 2009 | June.2009   | Jun | 9298.90265 | 1          | 94.742  | 27.399667 |
| 2010 | June.2010   | Jun | 5889.6982  | 1          | 151.876 | 27.396333 |
| 2011 | June.2011   | Jun | 0          | 0          | 87.628  | 27.771667 |
| 2003 | July.2003   | Jul | 5182.90135 | 1          | 178.04  | 25.343226 |
| 2004 | July.2004   | Jul | 964.19735  | 1          | 92.958  | 26.305806 |
| 2005 | July.2005   | Jul | 8424.84515 | 1          | 219.966 | 26.722258 |
| 2006 | July.2006   | Jul | 0          | 0          | 55.12   | 26.903226 |
| 2007 | July.2007   | Jul | 0          | 0          | 43.182  | 27.077742 |
| 2008 | July.2008   | Jul | 0          | 0          | 98.048  | 26.470968 |
| 2009 | July.2009   | Jul | 6940.20567 | 1          | 128.782 | 25.813871 |
| 2010 | July.2010   | Jul | 2548.6992  | 1          | 44.456  | 28.265484 |
| 2011 | July.2011   | Jul | 0          | 0          | 127.766 | 27.251935 |
| 2003 | August.2003 | Aug | 6808.0542  | 0.98387097 | 184.148 | 25.499677 |
| 2004 | August.2004 | Aug | 0          | 0          | 105.158 | 25.691613 |

|      |               |     |            |            |         |           |
|------|---------------|-----|------------|------------|---------|-----------|
| 2005 | August.2005   | Aug | 8577.6484  | 1          | 175.266 | 26.243226 |
| 2006 | August.2006   | Aug | 25.12353   | 0          | 165.364 | 26.96     |
| 2007 | August.2007   | Aug | 465.92695  | 0          | 226.544 | 28.08871  |
| 2008 | August.2008   | Aug | 2739.7295  | 0.0483871  | 406.136 | 25.960968 |
| 2009 | August.2009   | Aug | 3927.33545 | 1          | 179.336 | 25.587419 |
| 2010 | August.2010   | Aug | 763.15655  | 1          | 134.104 | 27.804333 |
| 2011 | August.2011   | Aug | 0          | 0          | 55.37   | 27.839677 |
| 2002 | October.2002  | Oct | 2219.7407  | 1          | 110.252 | 21.276452 |
| 2003 | October.2003  | Oct | 4763.45255 | 1          | 78.226  | 18.937419 |
| 2004 | October.2004  | Oct | 672.8567   | 1          | 48.266  | 20.592258 |
| 2005 | October.2005  | Oct | 3372.9528  | 1          | 27.436  | 18.660323 |
| 2006 | October.2006  | Oct | 0          | 0          | 91.19   | 18.111935 |
| 2007 | October.2007  | Oct | 18.6121    | 0          | 100.586 | 20.7      |
| 2008 | October.2008  | Oct | 962.50075  | 1          | 112.256 | 17.866774 |
| 2009 | October.2009  | Oct | 2498.05    | 1          | 110.49  | 20.128387 |
| 2010 | October.2010  | Oct | 0          | 0          | 6.096   | 19.319032 |
| 2003 | November.2002 | Nov | 2910.84035 | 1          | 166.622 | 12.4622   |
| 2004 | November.2003 | Nov | 3690.5862  | 1          | 49.54   | 15.4166   |
| 2005 | November.2004 | Nov | 498.2704   | 0.15       | 118.62  | 15.253    |
| 2006 | November.2005 | Nov | 913.949    | 1          | 75.43   | 14.928    |
| 2007 | November.2006 | Nov | 258.0282   | 1          | 104.424 | 12.964667 |
| 2008 | November.2007 | Nov | 0          | 0          | 45.464  | 13.3922   |
| 2009 | November.2008 | Nov | 1191.27765 | 1          | 72.636  | 12.304367 |
| 2010 | November.2009 | Nov | 1562.69675 | 1          | 55.37   | 13.299967 |
| 2011 | November.2010 | Nov | 0          | 0          | 122.18  | 13.885333 |
| 2003 | December.2002 | Dec | 2616.28955 | 1          | 127.764 | 8.912484  |
| 2004 | December.2003 | Dec | 3645.47635 | 1          | 50.538  | 7.687839  |
| 2005 | December.2004 | Dec | 2418.84365 | 1          | 90.676  | 8.934194  |
| 2006 | December.2005 | Dec | 1750.54    | 1          | 142.244 | 8.644097  |
| 2007 | December.2006 | Dec | 71.6145    | 0.27419355 | 113.03  | 12.00729  |
| 2008 | December.2007 | Dec | 46.4735    | 0.24193548 | 149.35  | 12.831871 |

|      |                |      |            |            |         |           |
|------|----------------|------|------------|------------|---------|-----------|
| 2009 | December.2008  | Dec  | 3186.6449  | 1          | 141.948 | 12.640097 |
| 2010 | December.2009  | Dec  | 4434.11173 | 1          | 220.224 | 9.93229   |
| 2011 | December.2010  | Dec  | 0          | 0          | 16.514  | 6.001387  |
| 2002 | September.2003 | Sept | 5980.24567 | 1          | 54.866  | 23.017    |
| 2003 | September.2004 | Sept | 454.43023  | 0.03333333 | 186.47  | 23.933    |
| 2004 | September.2005 | Sept | 4663.77255 | 1          | 0.508   | 24.989333 |
| 2005 | September.2006 | Sept | 0          | 0          | 121.16  | 23.202667 |
| 2006 | September.2007 | Sept | 0          | 0          | 24.388  | 24.684    |
| 2007 | September.2008 | Sept | 3262.10415 | 1          | 1.27    | 24.328667 |
| 2008 | September.2009 | Sept | 2910.84035 | 1          | 103.12  | 24.679    |
| 2009 | September.2010 | Sept | 0          | 0          | 34.796  | 25.654667 |
| 2010 | September.2011 | Sept | 0          | 0          | 76.204  | 23.439333 |

**Table S3.** Life history traits of our focal species used in the fourth-corner analysis. Breeding season trait is represented by First Collected (# of days from Jan. 1st), development is represented by Average Developmental Period (days), and length in mm. Length data from Knapp (2019), except for AMTAL, AMTIG and ANTER, which were taken from the Jones Center W51 drift fence database. Breeding is from Knapp (2019) and Development is from Knapp (2019) except AMTAL, AMTIG, and ANTER. AMTAL Development taken from Walls and Altig (1986) and Smith (1961) in Virginia. AMTIG and ANTER Development average taken from the W51 database 2003-2008.

| <b>Species</b> | <b>Breeding</b> | <b>Development</b> | <b>Length</b> |
|----------------|-----------------|--------------------|---------------|
| ACGRY          | 121             | 57.25              | 35.54         |
| AMTAL          | 148             | 33                 | 66.76         |
| AMTIG          | 123             | 138.3              | 135.42        |
| ANTER          | 124             | 63                 | 11.63         |
| GACAR          | 154             | 47.5               | 47.5          |
| HYCIN          | 182             | 47                 | 44.4          |
| HYGRA          | 119             | 78.75              | 62.17         |
| HYSQU          | 163             | 46.5               | 25.2          |
| LICAT          | 119             | 585                | 69.13         |
| LISPH          | 50              | 104.25             | 65.15         |
| PSNIG          | 50              | 49                 | 28.85         |
| PSORN          | 50              | 97.5               | 46.88         |
| SCHOL          | 72              | 39                 | 30.4          |

**Table S4.** Species richness and Shannon diversity across each sampling year in the two study wetlands.

| <b>Wetland</b> | <b>Water Year</b> | <b>Species<br/>Richness</b> | <b>Shannon<br/>Diversity</b> |
|----------------|-------------------|-----------------------------|------------------------------|
| 41             | 2006              | 7                           | 1.05                         |
|                | 2007              | 5                           | 1.15                         |
|                | 2008              | 4                           | 0.0004                       |
| 51             | 2003              | 10                          | 1.82                         |
|                | 2004              | 12                          | 0.47                         |
|                | 2005              | 12                          | 0.74                         |
|                | 2006              | 13                          | 2.15                         |
|                | 2007              | 11                          | 1.22                         |
|                | 2008              | 9                           | 0.61                         |
|                | 2009              | 10                          | 0.42                         |
|                | 2010              | 4                           | 0.80                         |
|                | 2011              | 7                           | 0.29                         |

**Table S5.** Total counts, biomass (dry mass; DM), C, N, and P exported by amphibians by year in W41 and W51.

| Wetland | Water<br>Year   | Total<br>Counts  | DM (g)          | C (g)          | N (g)          | P (g)         |
|---------|-----------------|------------------|-----------------|----------------|----------------|---------------|
| 41      | 2006            | 300              | 52.36           | 25.13          | 5.11           | 0.72          |
|         | 2007            | 84               | 63.60           | 31.74          | 6.11           | 0.78          |
|         | 2008            | 310422           | 26108.81        | 11519.10       | 2442.83        | 445.38        |
|         | <b>Averages</b> | <b>103602</b>    | <b>8741.59</b>  | <b>3858.66</b> | <b>818.02</b>  | <b>148.96</b> |
|         | <b>StDev</b>    | <b>179111.41</b> | <b>15040.46</b> | <b>6634.14</b> | <b>1407.13</b> | <b>256.71</b> |
| 51      | 2003            | 1192             | 943.85          | 436.07         | 108.97         | 15.57         |
|         | 2004            | 30486            | 2556.08         | 1077.66        | 255.23         | 41.50         |
|         | 2005            | 12473            | 2330.79         | 1032.92        | 266.01         | 38.70         |
|         | 2006            | 1719             | 584.23          | 272.59         | 65.69          | 9.44          |
|         | 2007            | 991              | 257.028         | 119.73         | 29.11          | 3.69          |
|         | 2008            | 6376             | 1367.81         | 642.28         | 153.19         | 17.19         |
|         | 2009            | 13757            | 635.43          | 274.94         | 68.21          | 10.90         |
|         | 2010            | 96               | 4.29            | 1.913          | 0.42           | 0.06          |
|         | 2011            | 2338             | 515.93          | 242.75         | 57.58          | 6.38          |
|         | <b>Averages</b> | <b>7714.22</b>   | <b>1021.72</b>  | <b>455.65</b>  | <b>111.60</b>  | <b>15.94</b>  |
|         | <b>StDev</b>    | <b>9938.13</b>   | <b>895.14</b>   | <b>384.96</b>  | <b>95.05</b>   | <b>14.72</b>  |



**Figure S1.** Percent of the total area of W41 and W51 that were inundated during the study. Amphibian sampling occurred from October 2002 to November 2011 (Water Years: 2003-2011) at W51 and from November 2005 to June 2008 (Water Years 2006 to 2008) at W41.

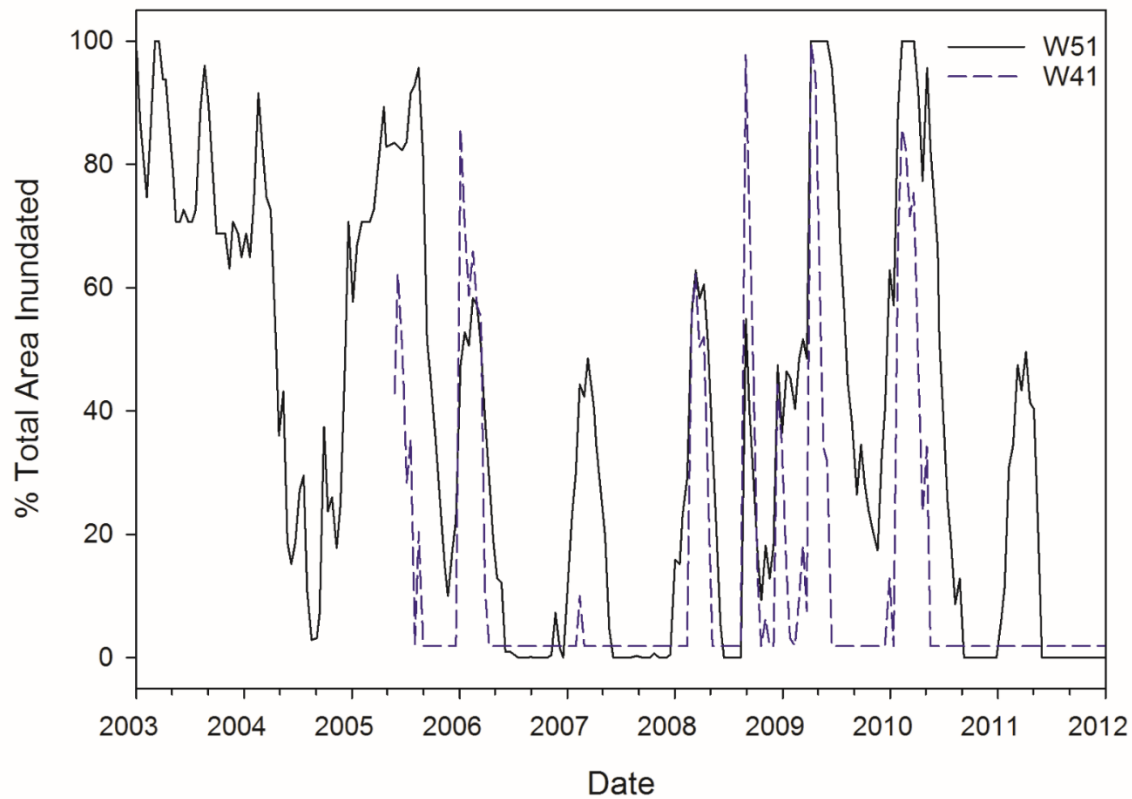

## References

Luhning, T. M, DeLong, J. P., and R. D. Semlitsch. (2017). Stoichiometry and life-history interact to determine the magnitude of cross-ecosystem element and biomass fluxes. *Frontiers in Microbiology* 8.

Smith, P.W. 1961. The amphibians and reptiles of Illinois. *Bulletin of the Illinois Natural History Survey* 28:1-298.

Walls, Susan C., and Ronald Altig. "Female reproductive biology and larval life history of *Ambystoma* salamanders: a comparison of egg size, hatchling size, and larval growth." *Herpetologica* (1986): 334-345.
